# Supplementary material for: Identification of a diazinon-metabolizing glutathione S-transferase in the silkworm, Bombyx mori
Source: PubMed Central journal article supplement (PMC4954967; doi:10.1038/srep30073), 2016-07-21
Supplement: srep30073-s1.pdf [file srep30073-s1.pdf]

**Identification of a diazinon-metabolizing glutathione *S*-transferase in  
the silkworm, *Bombyx mori***

Kohji Yamamoto\*, Naotaka Yamada

Department of Bioscience and Biotechnology, Kyushu University Graduate School,  
Fukuoka, Japan

\*Corresponding author:

Kohji Yamamoto

6-10-1 Hakozaki, Higashi-ku, Fukuoka 812-8581, Japan

Tel.: +81-92-621-4991; Fax: +81-92-624-1011;

E-mail: [yamamok@agr.kyushu-u.ac.jp](mailto:yamamok@agr.kyushu-u.ac.jp)

1 2 3 4 5 6 (kDa)

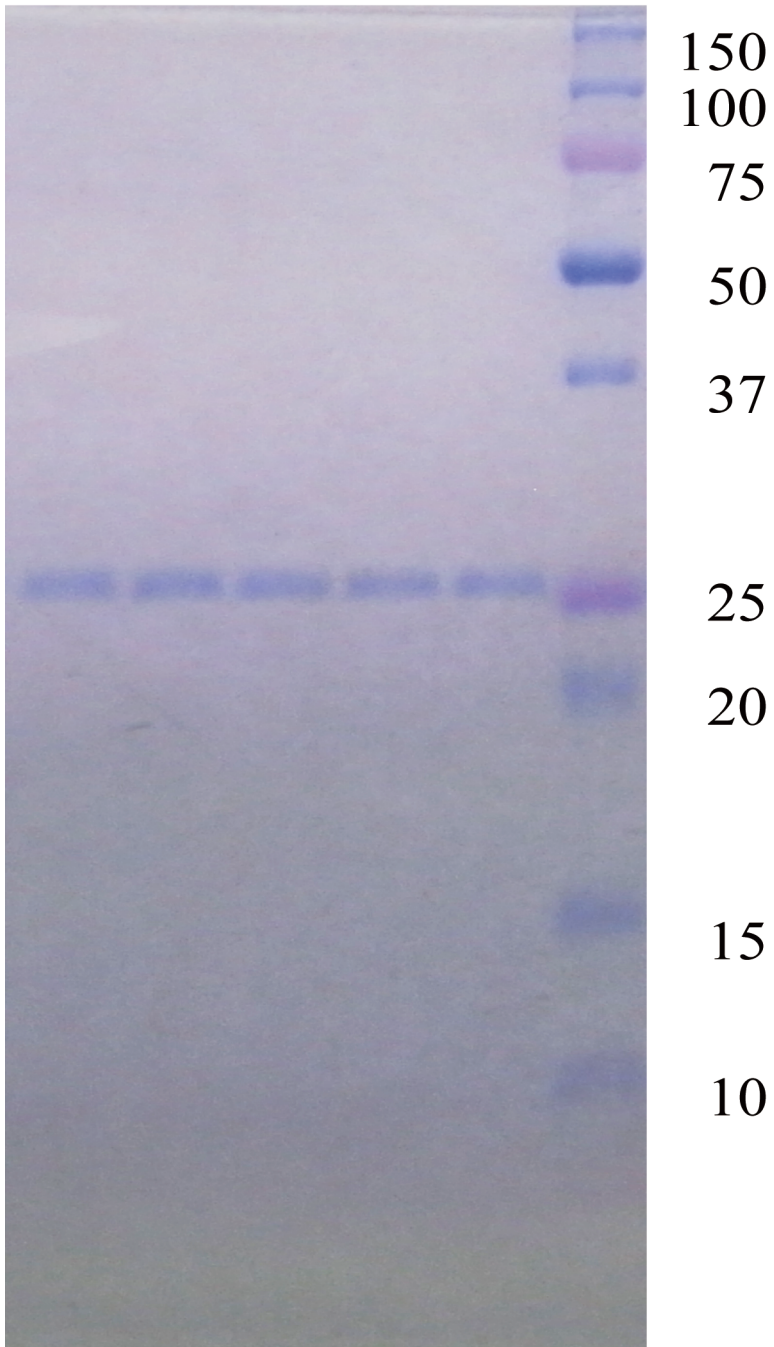

**Supplementary Figure S1 Sodium dodecyl sulfate polyacrylamide gel electrophoresis (SDS-PAGE) profile of recombinant bmGSTu2 and its mutants**

Purified recombinant proteins were applied to SDS-PAGE as described in the Methods section. M, protein molecular size markers; lane 1, WT; lane 2, I54A; lane 3, E66A; lane 4, S67A; lane 5, N68A.

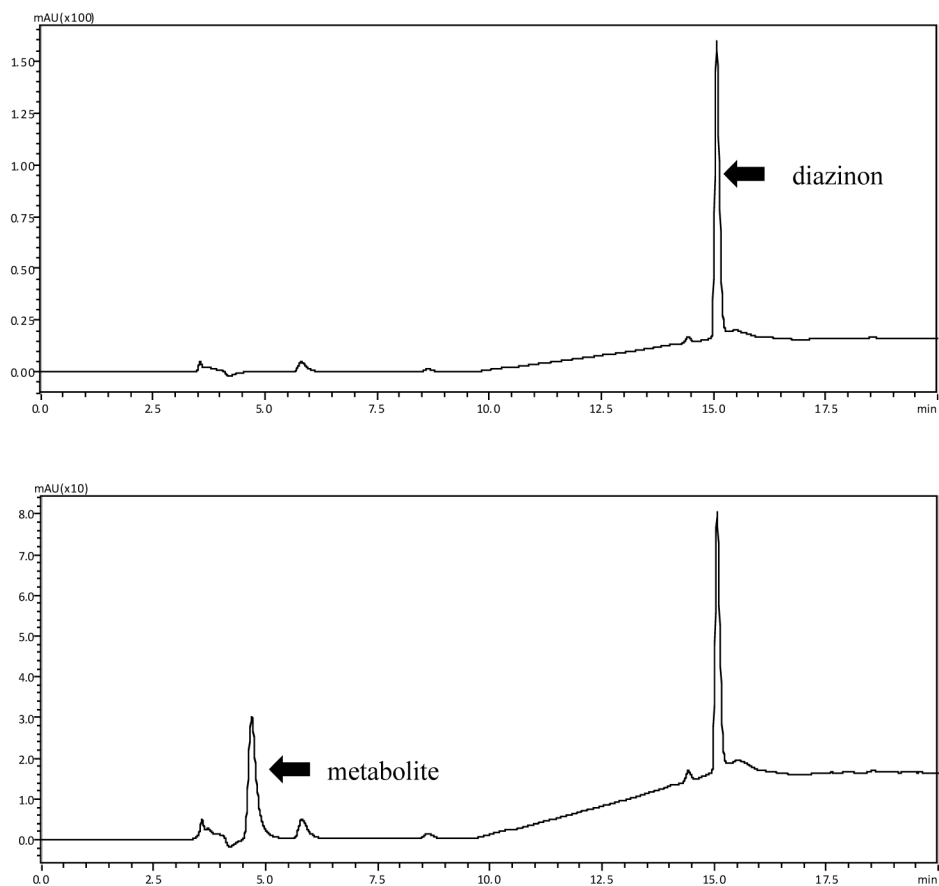

**Supplementary Figure S2 Analysis of diazinon metabolites of bmGSTu2 by Liquid-chromatography (LC)**

LC analysis after incubation of diazinon with bmGSTu2 and glutathione (GSH). Conditions were described in the Methods section. Diazinon and its metabolite are indicated with arrow.

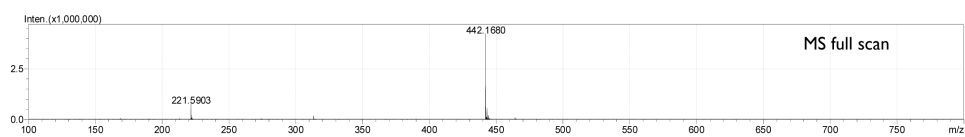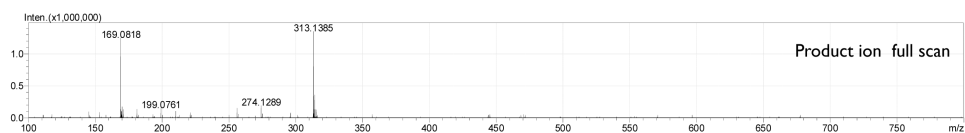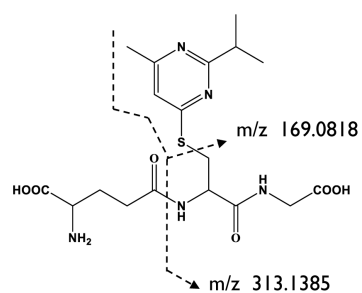

### Supplementary Figure S3 Analysis of diazinon metabolites of bmGSTu2 by Mass-spectrometry (MS)/MS

MS/MS analysis of the diazinon metabolite was carried out. The ion peaks at  $m/z$  169 and 313 correspond to the molecular ions of GSH-conjugated diazinon.

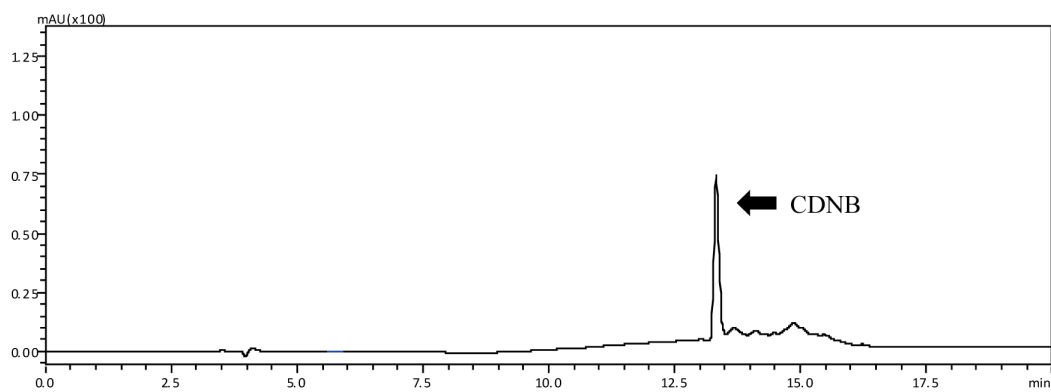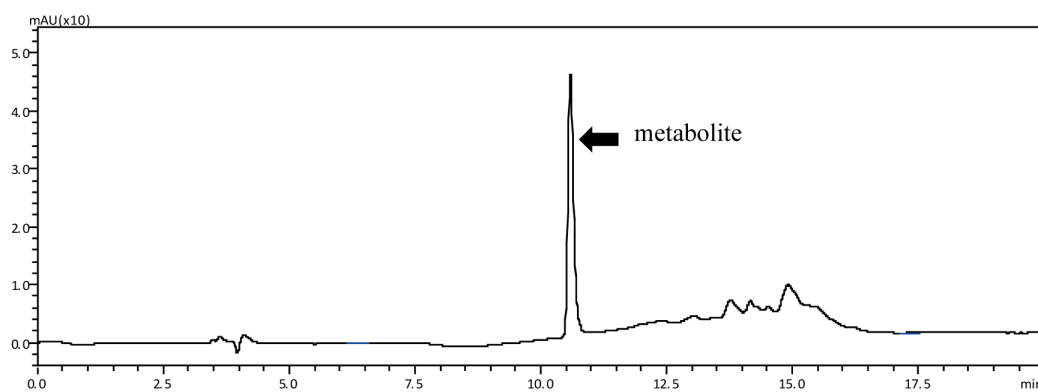

### Supplementary Figure S4 Analysis of 1-chloro-2,4-dinitrobenzene (CDNB)

#### metabolites of bmGSTu2 by LC

LC analysis after incubation of CDNB with bmGSTu2 and GSH. Conditions were described in the Methods section. CDNB and its metabolite are indicated with arrow.

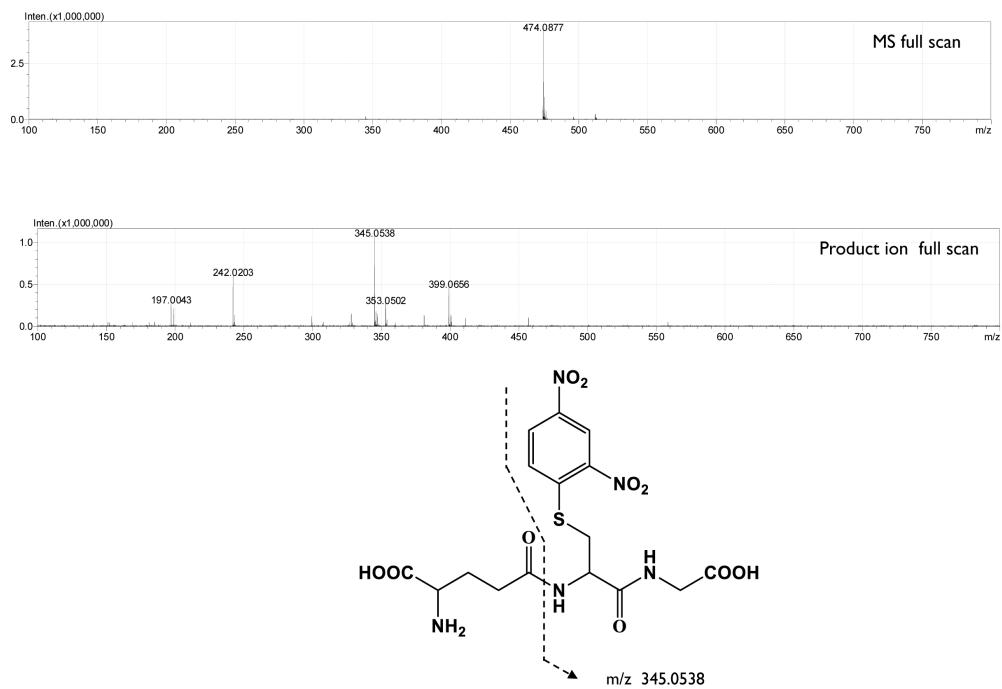

**Supplementary Figure S5 Analysis of 1-chloro-2,4-dinitrobenzene (CDNB) metabolites of bmGSTu2 by MS/MS**

MS/MS analysis of the CDNB conjugate was performed. The ion peaks at  $m/z$  345 correspond to the molecular ions of GSH-conjugated CDNB.
